# Supplementary material for: Age-related defects in autophagy alter the secretion of paracrine factors from bone marrow mononuclear cells
Source: Aging (Albany NY). 2021 Jun 4;13(11):14687–708. doi: 10.18632/aging.203127 (PMC8221303; doi:10.18632/aging.203127)
Supplement: Supplementary Figures [file aging-13-203127-s001.pdf]

## SUPPLEMENTARY FIGURES

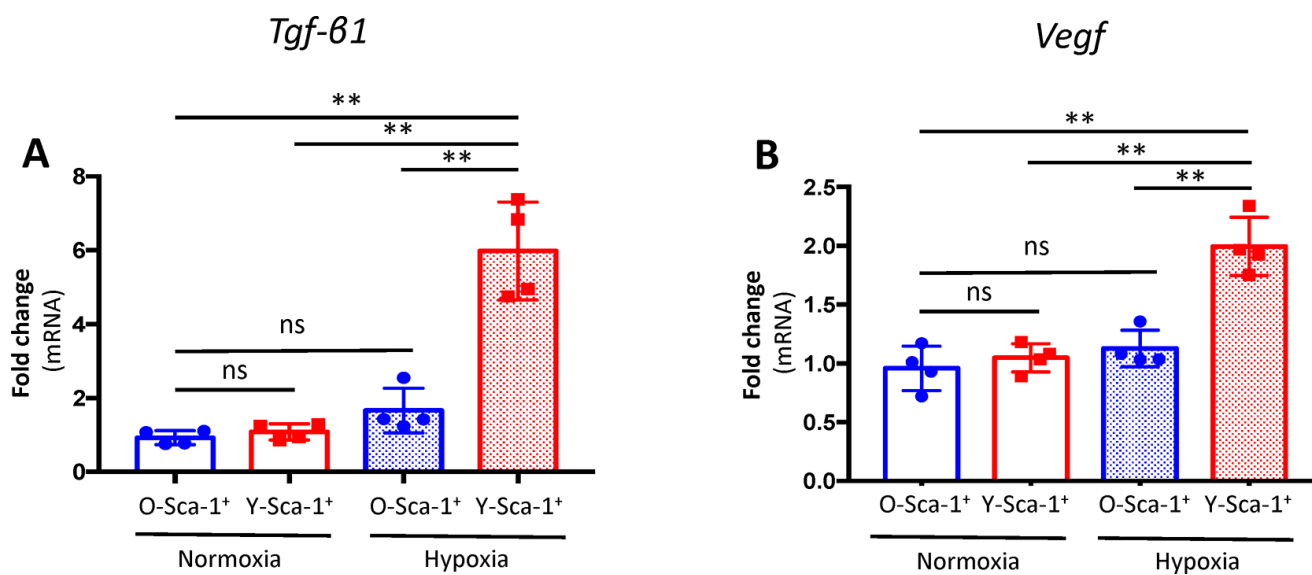

**Supplementary Figure 1.** *Tgf-β1* (A) *Vegf* (B) expression were measured in Y-Sca-1<sup>+</sup> and O-Sca-1<sup>+</sup> BMCs under normoxic and hypoxic conditions by qRT-PCR (n=4).

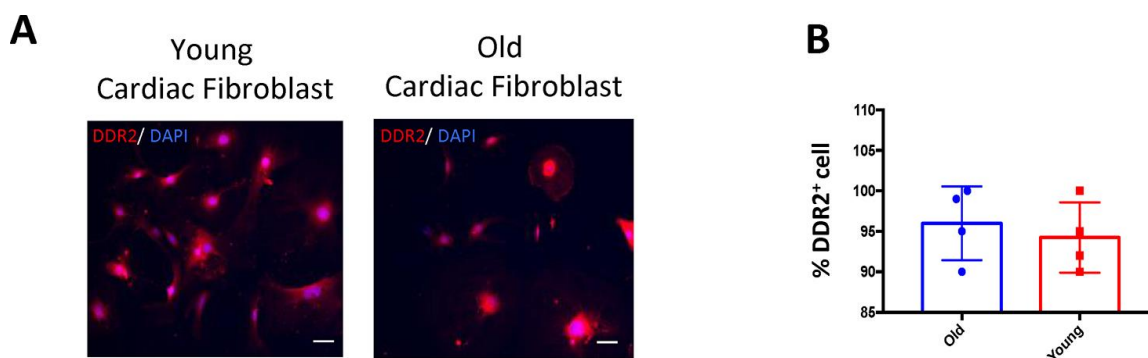

**Supplementary Figure 2. Fibroblast purity.** (A) Immunofluorescent staining was performed on old and young cardiac fibroblasts. DDR2 is shown in red and nuclei are in blue. Scale bar represents 50  $\mu$ m. (B) The percentage of DDR2 positive cells normalized to the total cell number calculated. A t-test was used to analyze data. Data are presented as mean $\pm$ SE; n=3-6.

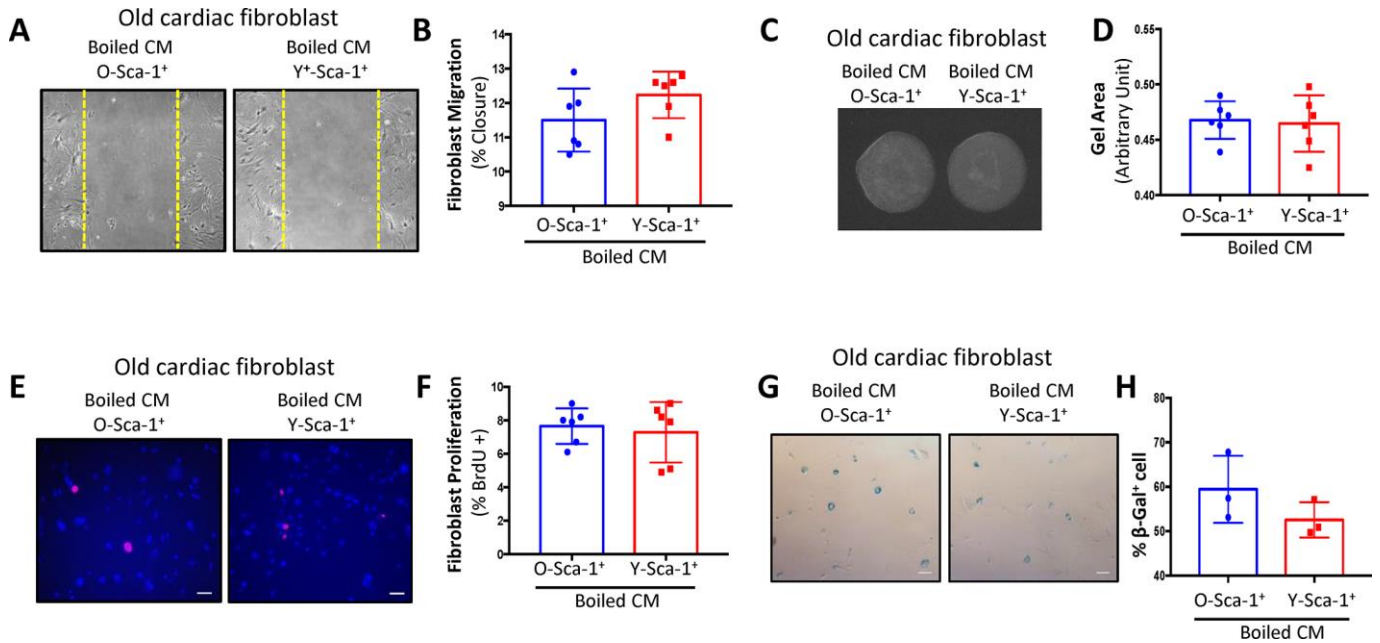

**Supplementary Figure 3. Heat inactivated conditioned medium (CM) from Y-Sca-1<sup>+</sup> BM cells did not stimulate autophagy in old cardiac fibroblasts.** (A) Representative images from a scratch wound assay of old cardiac fibroblasts treated with boiled Y-Sca-1<sup>+</sup> CM or boiled O-Sca-1<sup>+</sup> CM for 48 hours. The dashed yellow line indicates the wound edge at 0 hour. (B) The closing distances were measured using ImageJ. (C) Representative images of gels from a gel contraction assay of old cardiac fibroblasts treated with boiled Y-Sca-1<sup>+</sup> CM or boiled O-Sca-1<sup>+</sup> CM for 48 hours. (D) The gel area measured using ImageJ. (E) Representative images from a proliferation assay of old cardiac fibroblasts related with boiled Y-Sca-1<sup>+</sup> CM or boiled O-Sca-1<sup>+</sup> CM for 24 hours. (F) The percentage of BrdU positive cells to total cell number calculated. (G) Representative images of β-galactosidase<sup>+</sup> old cardiac fibroblasts treated with boiled Y-Sca-1<sup>+</sup> CM or boiled O-Sca-1<sup>+</sup> CM for 48 hours. (H) The percentage of β-galactosidase<sup>+</sup> cells to total cell number calculated. A t-test was used to analyze data. Data are presented as mean±SEM; n=3-6.

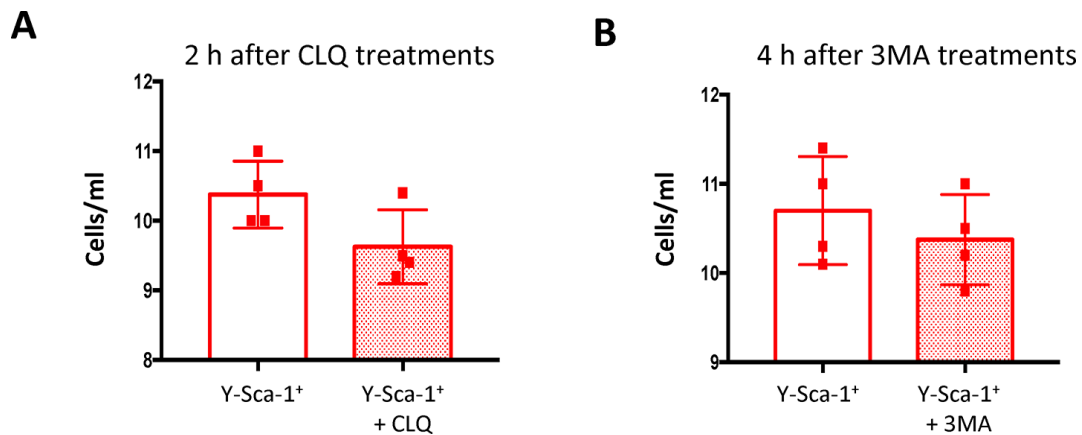

**Supplementary Figure 4. CLQ treatment does not induce cell death.** (A) Y-Sca-1<sup>+</sup> BM cells were counted after 2 hours of CLQ treatment and (B) Y-Sca-1<sup>+</sup> BM cells were counted after 4 hours of 3MA treatment. A t-test was used to analyze the data. Data are presented as mean±SEM.

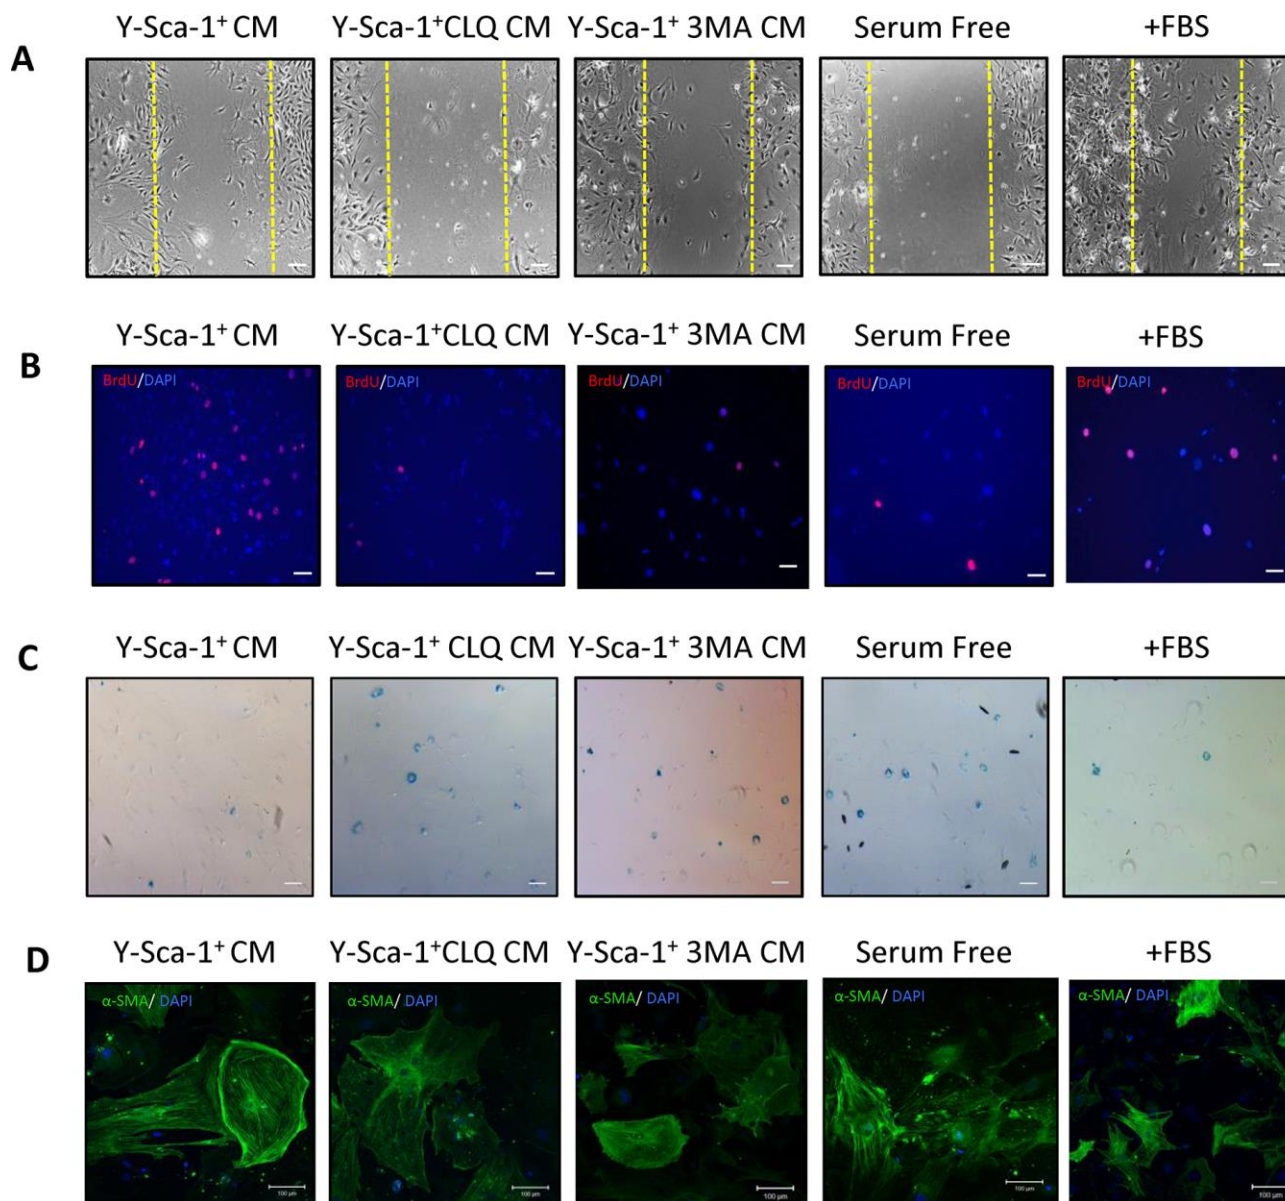

**Supplementary Figure 5. Y-Sca-1<sup>+</sup> BM cell autophagy regulates the beneficial effects of Y-Sca-1<sup>+</sup> CM on cardiac fibroblast function.** (A) Representative images from a scratch wound assay of old cardiac fibroblasts treated with Y-Sca-1<sup>+</sup> CM, Y-Sca-1<sup>+</sup> CLQ CM, Y-Sca-1<sup>+</sup> 3MA CM, serum free media or full medium (+FBS) for 48 hours. The dashed yellow line indicates the wound edge at 0 hour. (B) Representative images from a proliferation assay of old cardiac fibroblasts treated with Y-Sca-1<sup>+</sup> CM, Y-Sca-1<sup>+</sup> CLQ CM Y-Sca-1<sup>+</sup> 3MA CM, serum free media or full medium (+FBS) for 24 hours. (C) Representative images of  $\beta$ -galactosidase<sup>+</sup> old cardiac fibroblasts treated with Y-Sca-1<sup>+</sup> CM, Y-Sca-1<sup>+</sup> CLQ CM Y-Sca-1<sup>+</sup> 3MA CM, serum free media or full medium (+FBS) for 48 hours. (D) Representative images from  $\alpha$ -SMA staining of old cardiac fibroblasts treated with Y-Sca-1<sup>+</sup> CM, Y-Sca-1<sup>+</sup> CLQ CM Y-Sca-1<sup>+</sup> 3MA CM, serum free media or full medium (+FBS) for 24 hours. Scale bar represents 100  $\mu$ m.

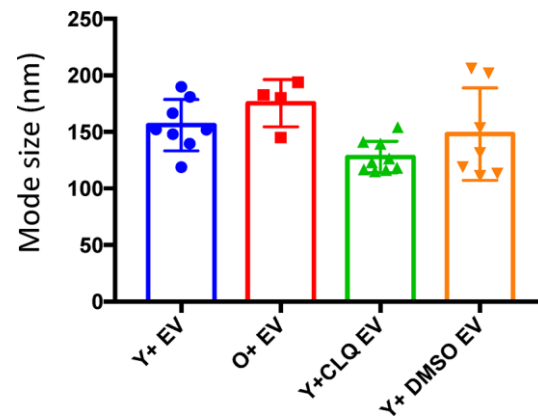

**Supplementary Figure 6. EV analysis from Y- and O-Sca-1<sup>+</sup> BMCs.** EV mode size of EVs isolated from CM harvested from Y-Sca-1<sup>+</sup> (Y<sup>+</sup> EV); O-Sca-1<sup>+</sup> (O<sup>+</sup> EV); Y-Sca-1<sup>+</sup> +CLQ (Y+CLQ) and, Y-Sca-1<sup>+</sup> +DMSO (Y+DMSO). One-way ANOVA was used to analyze data. Data presented as means ±SEM; n=4-8.
